# Supplementary material for: Investigating interdecadal salinity changes in the Baltic Sea in a 1850–2008 hindcast simulation
Source: Copernicus journal article supplement (doi:10.5194/cp-16-1617-2020), 2020-08-27
Supplement: Supplementary file 1 [file cp-16-1617-2020-supplement.pdf]

Supplement of *Clim. Past*, 16, 1617–1642, 2020  
<https://doi.org/10.5194/cp-16-1617-2020-supplement>  
© Author(s) 2020. This work is distributed under  
the Creative Commons Attribution 4.0 License.

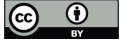

*Supplement of*

## **Investigating interdecadal salinity changes in the Baltic Sea in a 1850–2008 hindcast simulation**

**Hagen Radtke et al.**

*Correspondence to:* Hagen Radtke (hagen.radtke@io-warnemuende.de)

The copyright of individual parts of the supplement might differ from the CC BY 4.0 License.

# 1 Changes in inflow due to runoff

Inflow across Drogden Sill can be calculated from sea level at Viken and Klagshamn,  $\eta_V$  and  $\eta_K$ , by the following formula (?):

$$Q_{Sound} = \text{sign}(\eta_V - \eta_K) K \sqrt{|\eta_K - \eta_V|} \quad (1)$$

with the coefficient  $K = 74770 \text{ m}^{\frac{5}{2}} \text{ s}^{-1}$ . The sea level at Klagshamn relates to the mean sea level of the Baltic Sea,

$$\eta_K = \eta_{BS} + \eta'_K, \quad (2)$$

where the deviation  $\eta'_K$  is mostly meteorologically caused by wind stress. The Baltic Sea mean sea level is related to the total volume of the Baltic Sea by

$$\frac{dV_{BS}}{d\eta_{BS}} = A. \quad (3)$$

The term  $A_{BS}$  denotes the surface area of the Baltic Sea ( $4.12 \cdot 10^{11} \text{ m}^2$ ). If we neglect density variations (barotropic view), the volume of the Baltic Sea changes by three processes: Runoff, Precipitation minus evaporation, and volume flux from the North Sea,

$$\frac{dV_{BS}}{dt} = Q_{runoff} + Q_{PME} + Q_{NorthSea}, \quad (4)$$

which means

$$\frac{d\eta_{BS}}{dt} = \frac{1}{A} (Q_{runoff} + Q_{PME} + Q_{NorthSea}). \quad (5)$$

With a ratio of 7:3:1 for the transports between Great Belt, Sound and Little Belt (?), we get  $Q_{NorthSea} = 11/3 \cdot Q_{Sound}$ , meaning

$$\frac{d\eta_{BS}}{dt} = \frac{1}{A} \left( Q_{runoff} + Q_{PME} + \frac{11}{3} \text{sign}(\eta_V - \eta_K) K \sqrt{|\eta_K - \eta_V|} \right). \quad (6)$$

If we neglect wind variations and assume  $\eta_{BS} = \eta_K = \eta$ , we get

$$\frac{d\eta}{dt} = \frac{1}{A} \left( Q_{runoff} + Q_{PME} + \frac{11}{3} \text{sign}(\eta_V - \eta) K \sqrt{|\eta - \eta_V|} \right). \quad (7)$$

The stationary solution is given by

$$0 = Q_{runoff} + Q_{PME} - \frac{11}{3} K \sqrt{|\eta - \eta_V|} \quad (8)$$

$$\eta - \eta_V = \left( \frac{3}{11K} (Q_{runoff} + Q_{PME}) \right)^2. \quad (9)$$

With typical values ( $Q_{runoff} = 14000 \text{ m}^3 \text{ s}^{-1}$ ,  $Q_{PME} = 1300 \text{ m}^3 \text{ s}^{-1}$ ) this gives a value of 3.1 mm which should be the sea level difference if the outflow does not vary. But now let us assume that the variation in  $\eta$  only vanishes in the temporal mean:

$$0 = \langle Q_{runoff} + Q_{PME} \rangle + \frac{11}{3}K \langle \text{sign}(\eta_V - \eta)\sqrt{|\eta - \eta_V|} \rangle . \quad (10)$$

Now we can differentiate with respect to  $\eta$  and obtain

$$\begin{aligned} 0 &= \frac{d}{d\eta} \langle Q_{runoff} + Q_{PME} \rangle + \frac{11}{3}K \langle \frac{d}{d\eta} \left( \text{sign}(\eta_V - \eta)\sqrt{|\eta - \eta_V|} \right) \rangle \\ &= \frac{d}{d\eta} \langle Q_{runoff} + Q_{PME} \rangle + \frac{11}{3}K \langle \text{sign}(\eta_V - \eta) \frac{d}{d\eta} |\eta - \eta_V|^{0.5} \rangle \\ &= \frac{d}{d\eta} \langle Q_{runoff} + Q_{PME} \rangle + \frac{11}{3}K \langle \text{sign}(\eta_V - \eta) 0.5 |\eta - \eta_V|^{-0.5} \text{sign}(\eta - \eta_V) \rangle \\ &= \frac{d}{d\eta} \langle Q_{runoff} + Q_{PME} \rangle - \frac{11}{6}K \langle \sqrt{|\eta - \eta_V|}^{-1} \rangle \end{aligned} \quad (11)$$

$$\frac{11}{6}K \langle \sqrt{|\eta - \eta_V|}^{-1} \rangle = \frac{d}{d\eta} \langle Q_{runoff} + Q_{PME} \rangle \quad (12)$$

We can easily calculate that from the observed hourly series and obtain a value of  $488353 \text{ m}^2 \text{ s}^{-1}$  for  $dQ/d\eta$ . This means that a 7% change in runoff will change Baltic Sea level systematically by about 2.2 mm.

These 2.2 mm mean a volume of  $0.9 \text{ km}^3$ , or 1.1% of the volume of a typical DS5 inflow, or 4.8% of the typical inflow volume of  $18.75 \text{ km}^3$ . This explains roughly half of the observed variation (around 10% at the 30-year time scale). It takes 10 days to get the additional volume out by the enhanced outflow then.

## 2 Budget calculations

$$Q_{up}^s = Q_{bottom}^s - \frac{d}{dt} s_{bottom} \quad (13)$$

$$Q_{up}^V = Q_{bottom}^V - \frac{d}{dt} V_{bottom} \quad (14)$$

$$Q_{surface}^s = Q_{up}^s - \frac{d}{dt} s_{surface} \quad (15)$$

$$Q_{surface}^V = Q_{up}^V + Q_{river}^V - \frac{d}{dt} V_{surface} \quad (16)$$

$$\tilde{Q}_{surface}^s = \alpha Q_{surface}^V \frac{s_{surface}}{V_{surface}} \quad (17)$$

$$\frac{d}{dt} s_{surface} = Q_{up}^s - \alpha Q_{surface}^V \frac{s_{surface}}{V_{surface}} \quad (18)$$

$$s_{surface} = a(t) \left( s_{surface}(t_0) + \int_{t_0}^t \frac{Q_{up}^s(t')}{a(t')} dt' \right) \quad (19)$$

$$a(t) = \exp \left( - \int_{t_0}^t \frac{Q_{surface}^V}{V_{surface}} dt' \right) \quad (20)$$
